# Supplementary material
Source: publisher site journal article supplement (https://www.dovepress.com/article/250370)
Supplement: Supplementary file 1 [file get_supplementary_file.php]

**Supplementary Table 1** Primers for qRT-PCR

| **Gene** | **Primer (5’-3’)** |
| --- | --- |
| CMTM2 | F: CCAGCAAAGGGAAAGAAATGAC |
| R: GACAAGGAAGAGAGTGGAAACA |
| E-cadherin | F: CTTCTGCTGATCCTGTCTGATG |
| R: TGCTGTGAAGGGAGATGTATTG |
| N-cadherin | F: GACAGTTCCTGAGGGATCAAAG |
| R: CGATTCTGACCTCAACATCCC |
| β-catenin | F: ACTACCACAGCTCCTTCTCT |
| R: AAATCCCTGTTCCCACTCATAC |
| Vimentin | F: CAGCTTTCAAGTGTGCCTTTCTG |
| R: CTTGTAGGAGTGTCGGTTGTT |
| GAPDH | F: CAGGAGGCATTGCTGATGAT |
| R: GAAGGCTGGGGCTCATTT |

**Abbreviations:** F, forward primer; R, reverse primer.
